# Supplementary material for: Sink and Source Functions for Metal(loid)s in Sediments and Soils of Two Water Reservoirs of the Ore Mountains, Saxony, Germany
Source: MDPI journal article supplement (doi:10.3390/app12136354), 2022-06-22
Supplement: s1 [file s1]

## Supplementary material

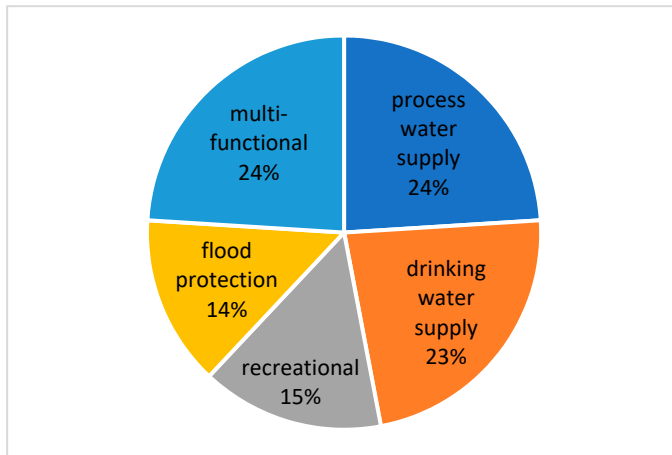

**Figure S1.** Primary uses of reservoirs in Saxony [21].

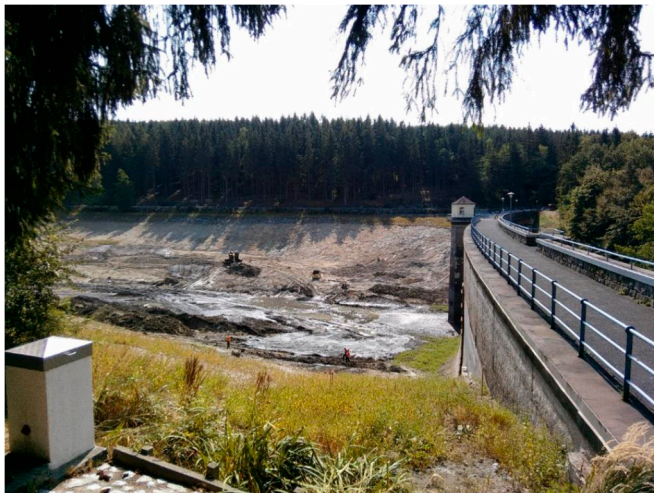

**Figure S2.** Dam of the Einsiedel Reservoir during excavation, view direction south (photo: T. Beier).

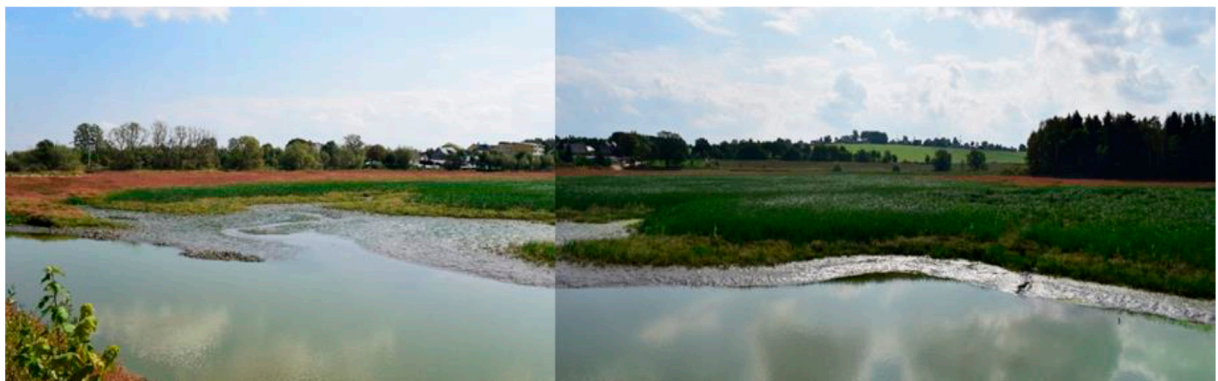

**Figure S3.** View from the dam of the Berthelsdorf Smelter pond (BSP) over the partly drained reservoir, view direction south-southeast (photo: C. J. Weber).

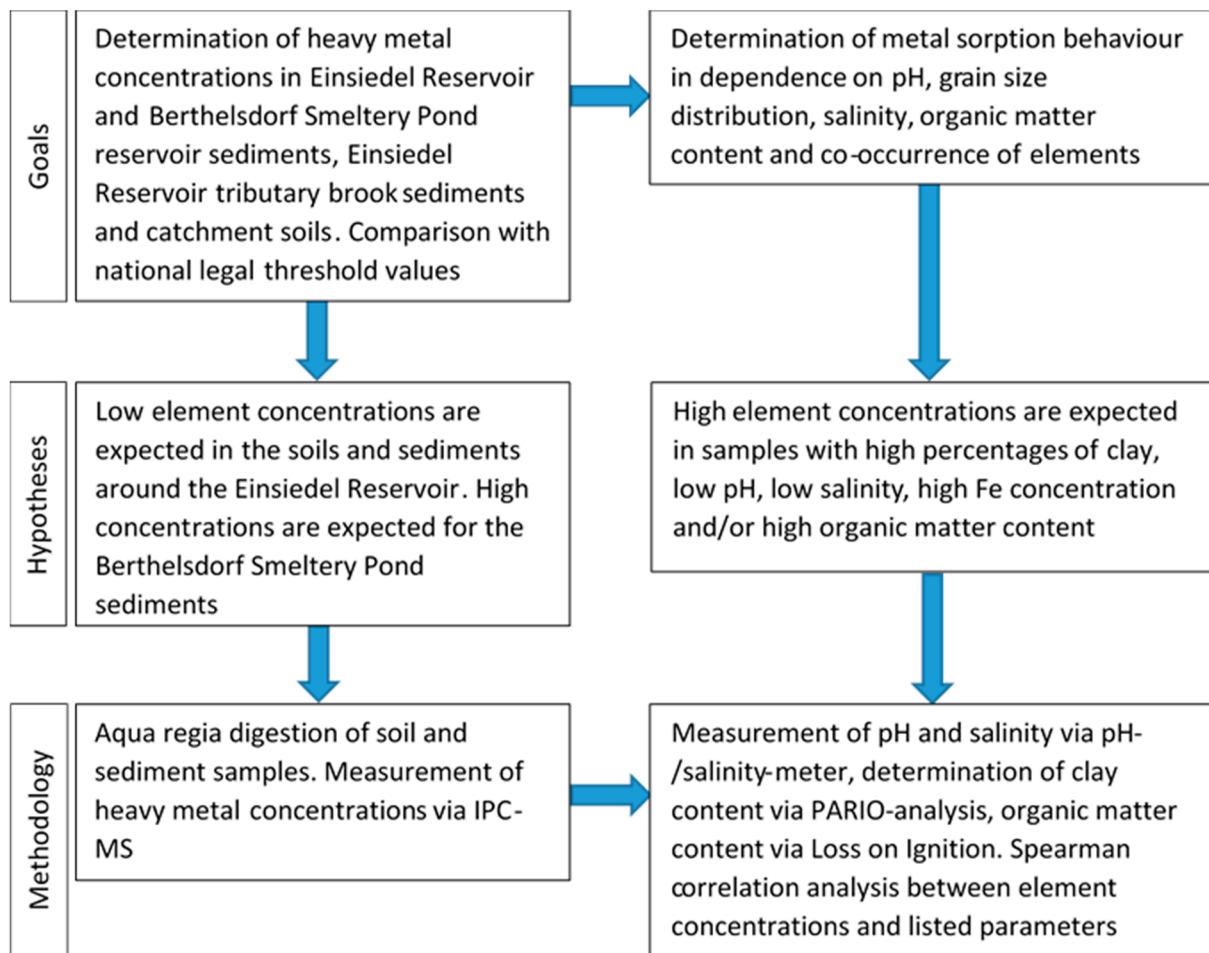

Figure S4. Schematic diagram of the research approach.

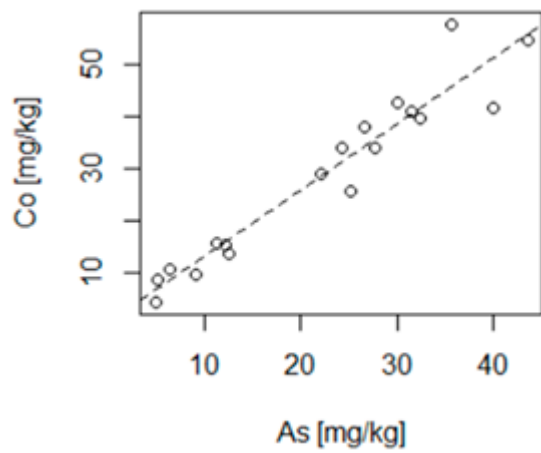

**Figure S5.** Bivariate diagram of Co-As from the Einsiedel Reservoir sediments.

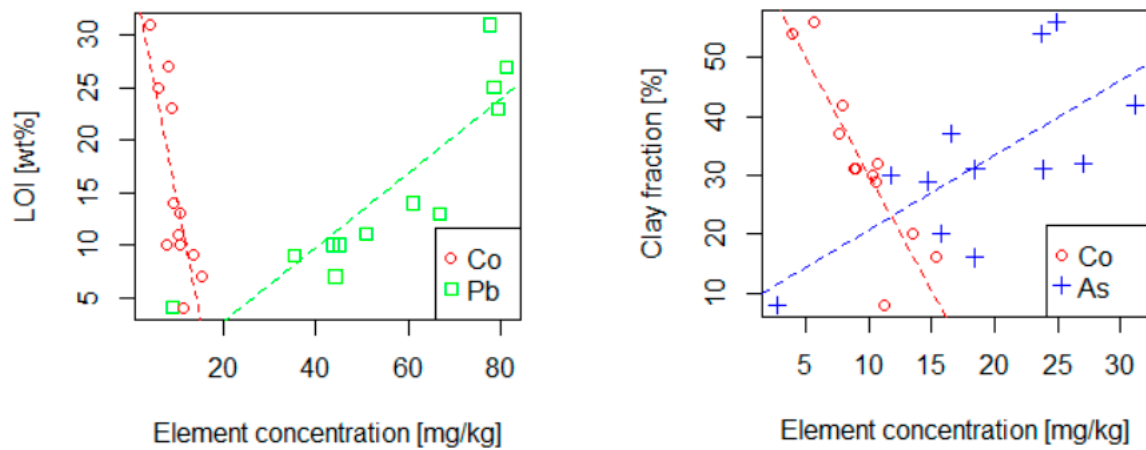

**Figure S6.** Bivariate diagrams of the LOI-Co/Pb and clay content-Co/As from the Einsiedel Reservoir catchment soils.

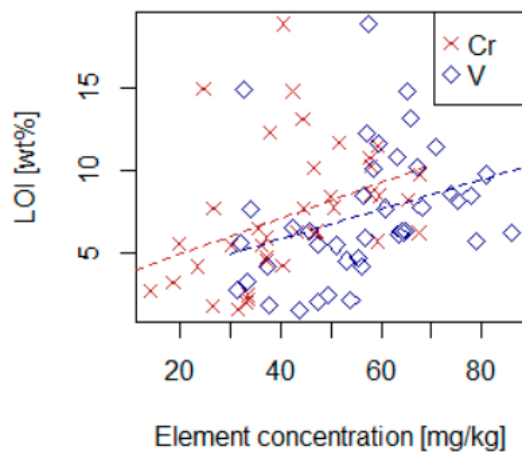

**Figure S7.** Bivariate diagram of the LOI-Cr/V content from the Berthelsdorf Reservoir sediments.

**Table S1.** Geogenic background values for organic cover layers (ocl), topsoils (tos) and subsoils (sus) of Saxon soils from phyllite, status May 2015 [43].

| Land use          | Horizon | As (mg/kg) |        | Cd (mg/kg) |        | Cr (mg/kg) |        | Cu (mg/kg) |        |
|-------------------|---------|------------|--------|------------|--------|------------|--------|------------|--------|
|                   |         | n          | median | n          | median | n          | median | n          | median |
| Arable Land       | tos     | 177        | 21     | 223        | 0.40   | 215        | 29     | 224        | 27     |
|                   | sus     | 106        | 16     | 113        | 0.27   | 106        | 35     | 109        | 21     |
| Grassland         | tos     | 166        | 29     | 189        | 0.43   | 180        | 32     | 191        | 28     |
|                   | sus     | 118        | 20     | 118        | 0.30   | 114        | 35     | 120        | 21     |
| Forest            | ocl     | 111        | 55     | 122        | 0.39   | 124        | 27     | 111        | 28     |
|                   | tos     | 224        | 65     | 234        | 0.13   | 234        | 34     | 217        | 18     |
|                   | sus     | 215        | 33     | 217        | 0.10   | 225        | 41     | 211        | 17     |
| Geol. underground |         | 49         | 13     | 50         | <0.1   | 54         | 40     | 54         | 24     |

| Land use          | Horizon | Hg (mg/kg) |        | Ni (mg/kg) |        | Pb (mg/kg) |        | Zn (mg/kg) |        |
|-------------------|---------|------------|--------|------------|--------|------------|--------|------------|--------|
|                   |         | n          | median | n          | median | n          | median | n          | median |
| Arable Land       | tos     | 175        | 0.16   | 210        | 29     | 222        | 55     | 224        | 130    |
|                   | sus     | 69         | 0.09   | 101        | 31     | 111        | 27     | 112        | 100    |
| Grassland         | tos     | 135        | 0.17   | 180        | 29     | 187        | 62     | 183        | 130    |
|                   | sus     | 72         | 0.10   | 111        | 29     | 116        | 33     | 120        | 110    |
| Forest            | ocl     | 58         | 0.38   | 109        | 18     | 127        | 220    | 124        | 81     |
|                   | tos     | 141        | 0.14   | 223        | 19     | 234        | 86     | 234        | 68     |
|                   | sus     | 133        | 0.09   | 225        | 25     | 221        | 31     | 218        | 81     |
| Geol. underground |         | 46         | <0.04  | 52         | 40     | 51         | 16     | 55         | 100    |

| Land use          | Horizon | Co (mg/kg) |        | V (mg/kg) |        |
|-------------------|---------|------------|--------|-----------|--------|
|                   |         | n          | median | n         | median |
| Arable Land       | tos     | 60         | 18     | 60        | 55     |
|                   | sus     | 43         | 19     | 59        | 59     |
| Grassland         | tos     | 78         | 14     | 64        | 55     |
|                   | sus     | 53         | 16     | 59        | 60     |
| Forest            | ocl     | 23         | 4.3    | 00        | 34     |
|                   | tos     | 84         | 6.6    | 167       | 53     |
|                   | sus     | 64         | 10     | 157       | 57     |
| Geol. underground |         | -          | -      | 53        | 63     |

Geol. Underground: layer below the subsoil, without or nearly without influences of the soil formation;

-: no data.

**Table S2.** Geogenic background values for organic cover layers (ocl), topsoils (tos) and subsoils (sus) of Saxon soils from gneiss, status May 2015 [43].

| Land use          | Horizon | As (mg/kg) |        | Cd (mg/kg) |        | Cr (mg/kg) |        | Cu (mg/kg) |        |
|-------------------|---------|------------|--------|------------|--------|------------|--------|------------|--------|
|                   |         | n          | median | n          | median | n          | median | n          | median |
| Arable Land       | tos     | 697        | 36     | 866        | 0.59   | 590        | 30     | 826        | 22     |
|                   | sus     | 507        | 20     | 529        | 0.25   | 258        | 32     | 496        | 17     |
| Grassland         | tos     | 560        | 36     | 717        | 0.50   | 616        | 30     | 704        | 21     |
|                   | sus     | 388        | 26     | 401        | 0.30   | 262        | 29     | 372        | 16     |
| Forest            | ocl     | 154        | 58     | 154        | 0.32   | 97         | 21     | 153        | 23     |
|                   | tos     | 277        | 70     | 267        | 0.12   | 214        | 22     | 271        | 14     |
|                   | sus     | 264        | 30     | 261        | 0.13   | 208        | 26     | 265        | 14     |
| Geol. underground |         | 86         | 15     | 82         | <0.1   | 86         | 30     | 88         | 19     |

| Land use          | Horizon | Hg (mg/kg) |        | Ni (mg/kg) |        | Pb (mg/kg) |        | Zn (mg/kg) |        |
|-------------------|---------|------------|--------|------------|--------|------------|--------|------------|--------|
|                   |         | n          | median | n          | median | n          | median | n          | median |
| Arable Land       | tos     | 532        | 0.12   | 584        | 17     | 877        | 83     | 835        | 140    |
|                   | sus     | 211        | 0.07   | 256        | 20     | 503        | 34     | 494        | 97     |
| Grassland         | tos     | 541        | 0.12   | 599        | 16     | 708        | 71     | 732        | 130    |
|                   | sus     | 191        | 0.07   | 257        | 18     | 390        | 34     | 385        | 99     |
| Forest            | ocl     | 77         | 0.25   | 96         | 12     | 156        | 200    | 151        | 65     |
|                   | tos     | 158        | 0.11   | 210        | 9.1    | 272        | 110    | 271        | 53     |
|                   | sus     | 156        | 0.07   | 207        | 13     | 259        | 46     | 264        | 72     |
| Geol. underground |         | 76         | <0.04  | 87         | 20     | 86         | 17     | 89         | 71     |

| Land use          | Horizon | Co (mg/kg) |        | V (mg/kg) |        |
|-------------------|---------|------------|--------|-----------|--------|
|                   |         | n          | median | n         | median |
| Arable Land       | tos     | 203        | 9.3    | 118       | 46     |
|                   | sus     | 163        | 10     | 112       | 44     |
| Grassland         | tos     | 251        | 9.9    | 127       | 44     |
|                   | sus     | 174        | 10     | 127       | 41     |
| Forest            | ocl     | 41         | 3.6    | 66        | 31     |
|                   | tos     | 152        | 3.9    | 105       | 38     |
|                   | sus     | 128        | 6.2    | 101       | 41     |
| Geol. underground |         | -          | -      | 84        | 41     |

Geol. Underground: layer below the subsoil, without or nearly without influences of the soil formation;

-: no data.
